1 **Community diversity determines the evolution of synthetic bacterial communities under artificial**  
2 **selection**

3

4 Tiffany Raynaud<sup>1</sup>, Marion Devers<sup>1</sup>, Aymé Spor<sup>1</sup>, Manuel Blouin<sup>1\*</sup>

5

6 <sup>1</sup>Agroécologie, AgroSup Dijon, INRAE, Univ. Bourgogne, Univ. Bourgogne Franche-Comté, F-21000  
7 Dijon, France

8

9 \*Corresponding author: [manuel.blouin@agrosupdijon.fr](mailto:manuel.blouin@agrosupdijon.fr)

10

11 **Abstract**

12

13           Artificial selection can be conducted at the community level in the laboratory through a  
14 differential propagation of the communities according to their level of expression of a targeted function  
15 (i.e. community phenotype). Working with communities instead of individuals as selection units brings  
16 in additional sources of variation in the considered phenotype that can arise through changes in  
17 community structure and influence the outcome of the artificial selection. These sources of variation  
18 could even be increased by manipulating species diversity. In this study, we wanted to assess the effect  
19 of manipulating initial community richness on artificial selection efficiency, defined as the change in  
20 the targeted function over time as compared to a control treatment without artificial selection. We  
21 applied artificial selection for a high productivity on synthetic bacterial communities varying for their  
22 initial richness level (from one to 16 strains). Our results showed that, overall, the communities that  
23 were artificially selected were 16% more productive than the control communities. Community richness  
24 positively influenced community productivity and metabolic capacities and was a strong determinant of  
25 the dynamics of community evolution. Our results suggested that community richness could influence  
26 artificial selection efficiency but a convergence of the community composition might have limited the  
27 effect of diversity on artificial selection efficiency. We propose that applying artificial selection on  
28 communities varying for their diversity could allow to find communities differing for their level of  
29 expression of a function but also for their responsiveness to artificial selection, provided that their initial  
30 composition is different enough.

31

32 **Key-words:** artificial selection efficiency, community diversity, community evolution, synthetic  
33 bacterial communities

## 34 Introduction

35

36 In 1989, in the framework of the levels-of-selection theory (or multi-level selection), Wilson and  
37 Sober supported the idea that natural selection at the community level could occur *in natura*. In the two  
38 last decades, several attempts have been made to enhance or reduce a property or a function performed  
39 by a microbial community through artificial selection at the community level in the laboratory. The  
40 general principle is to *i*) grow replicates of a microbial community, *ii*) assess the performance of these  
41 communities regarding the targeted function, *iii*) propagate the best performing community(ies). This  
42 approach has been used to study the degradation of a toxic compound (Swenson et al. 2000a), the  
43 modification of the pH of an aquatic medium (Swenson et al. 2000b), CO<sub>2</sub> emissions (Blouin et al.  
44 2015), chitinase activity (Wright et al. 2019), productivity (Raynaud et al. 2019), the hydrolysis of starch  
45 (Chang et al. 2020) and the growth promotion of a bacterial strain (Chang et al. 2020). All of the studies  
46 involving artificial selection of microbial communities showed that the engineering of complex  
47 microbial communities is not straightforward. In particular, improvements of the targeted function are  
48 often unstable (Swenson et al. 2000b; Raynaud et al. 2019; Wright et al. 2019) and registered at the  
49 beginning of the procedure only (Chang et al. 2020). This might be related to a decrease in community  
50 phenotypic variance and heritability over time (Blouin et al. 2015) but also to changes in community  
51 structure, due to the succession of species for example (Wright et al. 2019), that could limit artificial  
52 selection efficiency.

53 Artificial selection can be applied without any *a priori* knowledge of community composition or  
54 functioning but, assessing community diversity during an artificial selection experiment can allow a  
55 better understanding of community evolutionary dynamics in this context. It is well-known that the  
56 components of the diversity of a community (e.g. community richness, composition, evenness) can have  
57 an influence on many functions such as productivity or stability (Hooper et al. 2005). Several studies,  
58 conducted on bacterial communities and manipulating community richness (up to 72 species in Bell et  
59 al. (2005)), experimentally tested for effects of community diversity on the community respiration rate  
60 (Bell et al. 2005) or productivity (Gravel et al. 2011; Fetzer et al. 2015). These studies highlighted a  
61 positive and saturating relationship between the increase in community richness and the increase in the  
62 level of the measured function. Two main categories of mechanism can underlie a diversity-function  
63 relationship (Loreau et al. 2001): complementarity effects (i.e. the function is due to a combination of  
64 species through niche partitioning or facilitation between species) and selection effects (i.e. the function  
65 is due to a dominant species). Increasing community richness increases the probability of these  
66 mechanisms to occur (Loreau and Hector 2001) and thus to observe an increase in the studied function.

67 Beyond the effect of community diversity on the initial level of a function, increasing community  
68 diversity could also influence community response to selection. The term “evolution” is sometimes  
69 restricted to genetic changes over generations (Barraclough 2015). But, when it comes to community  
70 evolution, additional sources of variations can be involved in the community evolutionary response

71 (Penn 2003; Williams and Lenton 2007), provided that they can be transmitted to the next “generation  
72 of communities” (i.e. that they are heritable; Goodnight 2000). Indeed, the community phenotype can  
73 result from allelic composition and intragenomic interactions (i.e. epistasis), population composition  
74 and intraspecific interactions, and from species composition and interspecific interactions. All these  
75 sources of variations in community response to artificial selection depend on community diversity.  
76 Selecting at the community level while increasing species richness and thus the different sources of  
77 variations may increase the probability to observe extreme values for the targeted function among the  
78 fixed number of communities under selection. This increasing number of species should thus increase  
79 the selection differential (S) in the breeder equation ( $R = h^2 \times S$ , with R the response to selection and  $h^2$   
80 the heritability; Lush 1937). As a consequence, the response to selection (R) should be higher when  
81 there are many, as compared with few species, provided that the phenotype is reliably transmitted  
82 between parent and offspring communities (i.e.  $h^2 > 0$ ).

83 In this study, we wanted to explore the link between the diversity of a community and the efficiency  
84 of artificial selection. Previous artificial selection experiments were mainly conducted on complex  
85 natural microbial communities (retrieved from soil or plant leaves for example) that were then grown  
86 under laboratory conditions. Some studies assessed the changes in microbial community diversity over  
87 the course of the experiment (Raynaud et al. 2019; Jacquiod et al. 2021) but community diversity was  
88 not intentionally manipulated. We designed an experiment that combined the approaches developed in  
89 artificial selection of microbial communities and in biodiversity-ecosystem functioning experiments. An  
90 artificial selection procedure was applied on synthetic bacterial communities including five richness  
91 levels from one to 16 strains. We defined artificial selection efficiency as the change in the targeted  
92 phenotype – a high productivity – over time as compared to a control treatment without artificial  
93 selection. We hypothesized that increasing the diversity of the selected communities could be  
94 responsible for a larger range of variation in productivity, providing more opportunities for selection to  
95 act, and thus enhancing the efficiency of artificial selection.

96

## 97 **Materials and methods**

98

### 99 *Bacterial strains*

100 Eighteen bacterial strains were used in this experiment. They were chosen based on the  
101 screening of 38 laboratory strains for their ability to grow in the chosen experimental conditions  
102 (detailed below). Based on the growth curves of the 38 strains (assessed by Bioscreen, Oy Growth  
103 Curves Ab Ltd, Finland), we excluded the strains that showed an absence of growth, a slow growth or a  
104 decline, as well as strains that had a longer lag phase or a faster growth than the others. This was done  
105 to avoid the dominance of one or few strains from the very beginning of the experiment in communities  
106 due to too large differences in growth ability in our culture conditions. The 18 chosen strains belonged  
107 to three phyla, six classes and 12 genera (Table 1).

108

### 109 *Community construction*

110 The 18 strains were grown under five levels of initial richness: 1, 2, 4, 8, 16 strains. All the  
111 monocultures were grown (i.e. n=18 for level 1), and six communities per remaining level of richness  
112 were established (i.e. n=6 for levels 2, 4, 8 and 16). Community composition was determined by  
113 randomly choosing 16 strains among 18 without replacement to construct the six communities of the  
114 richness level 16. We built the communities from the lower richness levels as subsets of the communities  
115 of the upper richness level. The first eight strains that were randomly assigned to the first community of  
116 richness level 16 composed the first community of level 8 and so on until creating six communities of  
117 eight strains. The same method was used for levels 4 and 2.

118

### 119 *Growth conditions*

120 The culture medium was a mix of 1:5 lysogeny broth (LB) and 1:5 tryptic soy broth (TSB),  
121 these media notably differ for their carbon sources which can allow for niche partitioning (Van den  
122 Bergh et al. 2018). Before the start of the experiment, each strain was grown on a Petri dish (1:5 LB+TSB  
123 with agar) by streaking, starting from monocultures stored in 30% glycerol at -80 °C. Then, one colony  
124 per strain was picked and placed in 42 ml of culture medium in a flask (28 °C, 110 rpm, 24 h). The  
125 optical density (OD) was assessed at 600 nm (BioPhotometer 6131, Eppendorf, Germany) and each  
126 suspension was diluted to a final OD of 0.002. The diluted suspensions were used to inoculate  
127 monocultures and to build the communities by adding an equivalent volume of each required suspension  
128 according to the composition of the community. The monocultures and communities were grown in  
129 sterile 2 ml deep-well plates (Porvair Sciences, UK) filled with 1 ml of culture medium. Each  
130 monoculture (n=18) and community (n=24) was replicated 11 times i.e. 11 wells of a plate were  
131 inoculated with the same suspension. It resulted in six plates in total over which each level of richness  
132 was represented and an extra suspension was added as a control to track for possible “plate effects”.  
133 Temperature was kept to 28°C and there was no shaking in order to allow for possible spatial niche  
134 partitioning (Van den Bergh et al. 2018).

135

### 136 *Experimental evolution*

137 A transfer into a new plate and fresh medium occurred every 84 h for 20 weeks resulting in 40  
138 artificial selection cycles. The phenotype targeted by artificial selection was a high productivity which  
139 was assessed by OD measurement. Each 84 h, the content of the wells was homogenised by pipetting  
140 up and down and 200 µL of suspension were transferred into a microplate-reader compatible plate  
141 (Fisherbrand 96-Well plates, Fisher Scientific, USA). The OD was measured at 600 nm (Infinite M200  
142 PRO, Tecan, Switzerland) and the 200 µL of suspension were discarded. The artificial selection  
143 treatment (AS) occurred through *i*) the identification of the well among ten showing the highest OD, *ii*)  
144 the sampling of 20 µL of the corresponding suspension and *iii*) the inoculation of 980 µL of fresh

145 medium with these 20  $\mu$ L of suspension. The two latter steps were repeated until the ten wells of the  
146 new plate were inoculated. As previously mentioned, there were 11 wells for each monoculture or  
147 community; while ten wells were dedicated to the artificial selection, the remaining well was used as a  
148 control without artificial selection. 20  $\mu$ L of suspension were sampled from this well and inoculated into  
149 980  $\mu$ L of fresh medium whatever the OD of the suspension (No artificial Selection, NS). This treatment  
150 corresponded to a controlled natural selection (Conner 2003) in which environmental conditions were  
151 imposed but the communities were allowed to reproduce without artificial selection. At each transfer  
152 event, the suspensions that were used to inoculate the new plate (i.e. the suspension from the selected  
153 wells in AS and the suspension from the control wells) were stored in 30% glycerol at  $-80^{\circ}\text{C}$ .

154

#### 155 *Post-selection*

156 After the end of the experimental evolution, we revived the monocultures and communities from  
157 cycle 0 (i.e. initial inocula, hereafter called “ancestors”) and 40 (i.e. cultures after 40 selection cycles,  
158 hereafter called “evolved under AS”) from glycerol stocks. The control cultures (evolved under NS)  
159 were also included. The aim was to assess the phenotype of ancestors and evolved monocultures and  
160 communities at the same time in one experiment to corroborate what was observed in the artificial  
161 selection experiment. The monocultures and communities were first grown in 20 ml of culture medium  
162 in flasks ( $28^{\circ}\text{C}$ , 110 rpm, 24 h for the evolved under AS and NS and 48 h for the ancestors as 24 h were  
163 not enough for them to reach sufficient OD). The optical density was assessed at 600 nm (Infinite M200  
164 PRO, Tecan, Switzerland), each suspension was diluted in culture medium to a final OD of equivalent  
165 0.002 in BioPhotometer 6131 and allowed to grow in triplicate for 84 h in the growth conditions of the  
166 experimental evolution (i.e. deep-well plates,  $28^{\circ}\text{C}$ , no shaking, 1 ml of 1:5 LB+TSB). The OD was  
167 measured at 600 nm after 84 h of growth as previously described (see “Experimental evolution”). Three  
168 bacterial strains were grown on each plate (six in total) as controls for a possible “plate effect”.

169

#### 170 *Description of the growth dynamics*

171 To go further in the phenotypic description of the ancestor and evolved monocultures and  
172 communities, we used the same protocol as previously described (culture in flask at 110 rpm,  $28^{\circ}\text{C}$ , for  
173 either 24 or 48 h, OD measurement, dilution to a final OD of 0.002) and inoculated triplicate of the  
174 suspensions into microplates that were suitable for the detailed analysis of growth kinetics (sterile plates  
175 honeycomb, Thermo Scientific, USA). The growth conditions were: 200  $\mu$ L of 1:5 LB+TSB,  $28^{\circ}\text{C}$ , 15  
176 s of shaking occurring 5 s before each OD measurement, one measurement every 30 min for 84 h  
177 (Bioscreen, Oy Growth Curves Ab Ltd, Finland). Three bacterial cultures were grown on each plate  
178 (seven in total) as controls for a possible “plate effect”.

179

#### 180 *Metabolism*

181 We assessed the metabolic capabilities of the ancestor and evolved monocultures and  
182 communities (under AS and NS) using EcoPlates (Biolog, USA). 31 carbon (and nitrogen) sources  
183 belonging to six categories (amino acids, amines, carbohydrates, carboxylic acids, phenolic compounds  
184 and polymers ; Montserrat Sala et al. 2010) were tested. In the same way as the post-selection experiment  
185 and the growth dynamic description experiment, ancestors and evolved (under AS and NS)  
186 monocultures and communities were revived and grown in flasks (110 rpm, 28°C, either 24h or 48h).  
187 Then, OD was assessed and the suspensions were diluted in 0.9% NaCl solution to reach a final OD of  
188 0.2 (tests were conducted before the start of the experiment and showed that cell washing gave similar  
189 results to those obtained with a dilution approach indicating that a remaining amount of culture medium  
190 in the suspension did not changed the results). EcoPlates were inoculated with 120  $\mu$ L of diluted  
191 suspension (one plate per sample, each substrate was repeated three times per plate) and placed at 28 °C  
192 without shaking. When a substrate was used by the bacteria, a tetrazolium dye was reduced which  
193 produced a purple coloration which was assessed by OD measurement at 590 nm (Infinite M200 PRO,  
194 Tecan, Switzerland). A first measurement was done four hours after the inoculation and then twice a  
195 day for four days.

196

#### 197 *Community composition analysis*

198 To assess for changes in community composition over the experiment, we performed 16S rRNA  
199 gene and *gyrB* sequencing on communities from selection cycles 1, 14, 27 and 40 for both AS and NS.  
200 In order to track for the presence of contaminants, 16S rRNA gene and *gyrB* sequencing was performed  
201 on monocultures from selection cycles 1 and 40 (see Appendix 1 for the details on DNA extractions,  
202 PCR and bioinformatics analyses).

203

#### 204 *Statistical analyses*

205 We first ran preliminary analyses to check for the presence of contaminants in the samples (i.e.  
206 strains that were not included in the initial species composition) and to determine at which step of the  
207 experimentations they occurred as it could have or not an influence on the results and more particularly  
208 on the validation of our main hypothesis (see Appendix 2). It resulted in the removal of 16.7% of the  
209 samples in the experimental evolution dataset and 14.3% of the samples in the growth dynamics,  
210 metabolism and post-selection datasets. The smallest sample size (n) occurred for the artificial selection  
211 treatment at richness levels 2 and 4 for which n was equal to 4 (instead of 6). The following analyses  
212 were conducted on the resulting datasets.

213 The data from the experimental evolution procedure were analysed with the following linear  
214 mixed model:

$$215 \quad Y_{ijkl} = \mu + \alpha_i + \beta_j + \gamma * l + (\alpha\beta)_{ij} + (\alpha\gamma)_i * l + (\beta\gamma)_j * l + (\alpha\beta\gamma)_j * l + I_k + E_{ijkl}$$

216  $Y_{ijkl}$  is the OD of the individual (i.e. monoculture or community) of identity  $k$ , of initial richness level  
217  $i$ , under selection treatment  $j$ , at cycle  $l$ .  $\mu$  is the intercept.  $\alpha_i$  is the effect of the initial richness level

218 (qualitative: 1, 2, 4, 8, 16),  $\beta_j$  is the effect of the selection treatment (qualitative: AS, NS).  $\gamma * l$  is the  
219 effect the selection cycle (quantitative: 1 to 40). The interaction effects between *i*) the initial richness  
220 level and the selection treatment ( $\alpha\beta$ )<sub>ij</sub>; *ii*) the initial richness level and the selection cycle ( $\alpha\gamma$ )<sub>i \* l</sub>;  
221 *iii*) the selection treatment and the selection cycle ( $\beta\gamma$ )<sub>j \* l</sub>; *iv*) the initial richness level, the selection  
222 treatment and the selection cycle ( $\alpha\beta\gamma$ )<sub>j \* l</sub> were also included in the model.  $I_k$  is the random effect of  
223 the individual and  $E_{ijkl}$  is the residual error. An autoregression structure of order 1 (AR1) was included  
224 to correct for temporal autocorrelation in the data. We expected that an increase in OD over the selection  
225 cycles will be *i*) stronger in AS than NS (i.e. significant effect of ( $\beta\gamma$ )<sub>j \* l</sub>); *ii*) stronger in communities  
226 with high initial richness than in the ones with low richness (i.e. significant effect of ( $\alpha\gamma$ )<sub>i \* l</sub>); and that  
227 the overall gain in OD will be *iii*) stronger at high richness level in AS than in NS (i.e. significant effect  
228 of ( $\alpha\beta$ )<sub>ij</sub>). Our main hypothesis regarding an increase in selection efficiency with the increase in  
229 richness would be verified if *iv*) the increase in OD over the course of the experiment is stronger in AS  
230 than NS when richness increases (i.e. significant effect of the three-way interaction ( $\alpha\beta\gamma$ )<sub>j \* l</sub>). The  
231 analysis was done on the selected wells only in order to balance the dataset between AS and NS (one  
232 OD value per individual, cycle and selection treatment). The OD values were log10 transformed in order  
233 to meet the criteria for normality and homoscedasticity.

234 We detected a plate effect in the post-selection experiment: the OD of the control strains of two  
235 of the plates was lower than the observed OD for the other plates. We calculated the difference in OD  
236 and add this value to the measured OD of the two plates. Note that this correction did not significantly  
237 influence the results of the analysis. In order to compare what was observed during the experimental  
238 evolution and what was obtained from the post selection experiment, the data were analysed with the  
239 following linear mixed model:

$$240 \quad Y_{ikmn} = \mu + \alpha_i + \delta_m + \tau_n + (\alpha\delta)_{im} + (\alpha\tau)_{in} + (\delta\tau)_{mn} + (\alpha\delta\tau)_{imn} + I_k + E_{ikmn}$$

241  $Y_{ikmn}$  is the OD of the individual of identity  $k$ , of initial richness level  $i$ , of history  $m$ , in dataset  
242  $n$ .  $\mu$  is the intercept,  $\alpha_i$  is the effect of the initial richness level (qualitative: 1, 2, 4, 8, 16),  $\delta_m$  is the  
243 effect of the history (qualitative: ancestor, evolved under AS, evolved under NS),  $\tau_n$  is the effect the  
244 dataset (qualitative: experimental evolution, post-selection). The interaction effects between *i*) the initial  
245 richness level and the history ( $\alpha\delta$ )<sub>im</sub>; *ii*) the initial richness level and the dataset ( $\alpha\tau$ )<sub>in</sub>; *iii*) the history  
246 and the dataset ( $\delta\tau$ )<sub>mn</sub>; *iv*) the initial richness level, the history and the dataset ( $\alpha\delta\tau$ )<sub>imn</sub> were also  
247 included in the model.  $I_k$  is the random effect of the individual and  $E_{ikmn}$  is the residual error.

248 The description of the growth dynamics allowed to produce growth curves for each of the  
249 individual of the experiment under the three evolutionary histories (ancestor, evolved under AS, evolved  
250 under NS). We described the growth curves with segmented regressions which allowed to get the slopes  
251 of the different growth phases (four slopes) and the time of transition from one phase to the other (three  
252 breakpoints). From the growth curves, we also extracted the OD at 3.5 days (i.e. the targeted phenotype),



253 the maximum OD and the time to reach the maximum OD. The obtained values for the three replicates  
254 of one individual were averaged. The data were analysed with the following linear model:

$$255 \quad Y_{ikm} = \mu + \alpha_i + \delta_m + (\alpha\delta)_{im} + I_k + E_{ikm}$$

256  $Y_{ikm}$  is the growth parameter of the individual of identity  $k$ , of initial richness level  $i$ , of history  
257  $m$ .  $\mu$  is the intercept,  $\alpha_i$  is the effect of the initial richness level,  $\delta_m$  is the effect of the history,  $(\alpha\delta)_{im}$   
258 is the effect of the interaction between the initial richness level and the history.  $I_k$  is the random effect  
259 of the individual and  $E_{ikmn}$  is the residual error. A principal component analysis (PCA) including the  
260 ten growth parameters was performed and Euclidean distances between ancestors and evolved under AS  
261 and NS were computed based on the coordinates given by the PCA.

262 The same linear model as for the growth dynamic description experiment was used to analyse  
263 the number of metabolized substrates by the ancestors and evolved monocultures and communities (see  
264 Appendix 3 for details on the distinction between metabolized and non-metabolized substrates). The  
265 level of substrate use (i.e. the maximum OD reached on the different substrates) was analysed with the  
266 following linear mixed model:

$$267 \quad Y_{ikmop} = \mu + \alpha_i + \delta_m + \varphi_o + (\alpha\delta)_{im} + (\alpha\varphi)_{io} + (\delta\varphi)_{mo} + (\alpha\delta\varphi)_{imo} + I_k + S_p + E_{ikmop}$$

268  $Y_{ikmop}$  is the OD of the individual of identity  $k$ , of initial richness level  $i$ , of history  $m$ , for  
269 substrate category  $o$  and substrate  $p$ .  $\mu$  is the intercept,  $\alpha_i$  is the effect of the initial richness level,  $\delta_m$  is  
270 the effect of the history.  $\varphi_o$  is the effect of the substrate category. The interaction effects between i) the  
271 initial richness level and the history  $(\alpha\delta)_{im}$ ; ii) the initial richness level and the substrate category  
272  $(\alpha\varphi)_{io}$ ; iii) the history and the substrate category  $(\delta\varphi)_{mo}$ ; iv) the initial richness level, the history and  
273 the substrate category  $(\alpha\delta\varphi)_{imo}$  were also included in the model.  $I_k$  is the random effect of the  
274 individual,  $S_p$  is the random effect of the substrate and  $E_{ikmnop}$  is the residual error. A PCA was  
275 conducted with the 31 substrates as variables.

276 All the analyses were performed with R version 3.6.3 with the following packages: nlme  
277 (Pinheiro et al. 2021) and lmerTest (Kuznetsova et al. 2017) for linear mixed models, car for type II  
278 analyses of variance (Fox and Weisberg 2019), emmeans for slope calculation (Lenth 2021), mclust for  
279 mixture models (Scrucca et al. 2016), segmented for segmented regressions (Muggeo 2008),  
280 FactoMineR for PCA (Lê et al. 2008).

281

## 282 **Results**

283

### 284 *Artificial selection and initial richness level effects on mean OD*

285 All selection cycles together, the OD in AS was significantly higher than this observed for NS  
286 (selection treatment:  $\chi^2=89$ ;  $p_{df=1}<2.2\times 10^{-16}$ ; Table 2): AS produced a gain in OD of 0.11, i.e. +16.4%  
287 as compared to NS. However, considering population mean in AS rather than the selected individuals  
288 only, the gain in OD in AS as compared to NS was +0.036, i.e. +5.3% ( $\chi^2=15$ ;  $p_{df=1}=1.1\times 10^{-4}$ ). There

289 was also a significant effect of the initial richness level on OD ( $\chi^2=23$ ,  $p_{df=4}=1.5 \times 10^{-4}$ ; Table 2). All  
290 selection cycles together, the OD tended to increase with the increase in the initial richness level (from  
291  $0.56 \pm 0.28$  to  $0.89 \pm 0.12$ ) with significant differences between monocultures and levels 8 and 16.

292

### 293 *OD of ancestors and evolved monocultures and communities*

294 The OD of the monocultures and communities at the end of the experiment (i.e. evolved under  
295 AS or NS) differed from the OD of the monocultures and communities at the beginning of the  
296 experiment (i.e. ancestors). The OD of the ancestors was lower than the one of the evolved under NS  
297 which was lower than the one of the evolved under AS ( $0.58 \pm 0.23$ ,  $0.71 \pm 0.27$  and  $0.80 \pm 0.24$   
298 respectively;  $\chi^2=83$ ;  $p_{df=2} < 2.2 \times 10^{-16}$ ; Table S1). Thus, the artificially selected monocultures and  
299 communities were more productive than the ancestors and than the evolved under NS. This result did  
300 not depend on the initial richness level (initial richness level\*history:  $\chi^2=3.0$ ;  $p_{df=8}=0.93$ ; Table S1) and  
301 was consistent when considering either the OD retrieved from the experimental evolution or the OD  
302 measured in the post-selection experiment (Figure 1a and b; no effect of the dataset:  $\chi^2=1.2$ ;  $p_{df=1}=0.28$ ;  
303 Table S1). However, when OD was measured in different growth conditions than those of the  
304 experimental evolution (i.e. in the system used to assess growth dynamics), the effect of the evolution  
305 depended on the dataset ( $\chi^2=329$ ;  $p_{df=4} < 2.2 \times 10^{-16}$ ) and the evolved under AS and NS showed a  
306 significantly lower OD than the ancestors (respectively  $0.97 \pm 0.13$ ,  $0.95 \pm 0.16$  and  $1.1 \pm 0.22$ ; Figure 1c)  
307 indicating that the abiotic environment influenced the expression of the phenotype under selection.

308

### 309 *Artificial selection and initial richness level effects on OD change over time*

310 There was no significant effect of the selection treatment on OD change over time (selection  
311 cycle\*selection treatment:  $\chi^2=0.73$ ;  $p_{df=1}=0.39$ ; Table 2). It indicated that, all richness levels together,  
312 the slope of the OD over the selection cycles was not different between AS and NS. On the contrary, the  
313 OD change over time was influenced by the initial richness level (selection cycle\*initial richness level:  
314  $\chi^2=14$ ;  $p_{df=4}=7.5 \times 10^{-3}$ ; Table 2): OD tended to increase over time for the lowest (monocultures) and  
315 highest richness levels (eight and 16 strains) whereas it tended to decrease for intermediate richness  
316 levels (two and four strains; Figure 2).

317

### 318 *Artificial selection efficiency regarding the initial richness level*

319 The outcome of artificial selection (AS) as compared to no artificial selection (NS) did not differ  
320 between the initial richness levels (selection cycle\*selection treatment\*initial richness level:  $\chi^2=1.4$ ;  
321  $p_{df=4}=0.84$ ; Table 2; Figure 2). It indicated that AS was not significantly effective whatever the initial  
322 richness level. However, there is still evidence for a possible influence of AS on OD change over time  
323 as compared to NS. Indeed, the slope of the OD over the selection cycles tended to be higher in AS than  
324 in NS in four richness levels over five (Figure 2f). Also, the differences in the slopes between AS and  
325 NS tended to be influenced by the initial richness level. Among the richness levels that showed an

326 increase in OD over time, the highest differences in slopes between AS and NS occurred for level 8,  
327 where the slope in AS significantly differed from zero contrary to the slope in NS ( $4.4 \times 10^{-3}$  and  $2.4 \times 10^{-3}$   
328 respectively), and for monocultures. On the contrary, the smallest difference occurred with an initial  
329 richness of 16 strains where both slopes were very similar ( $3.0 \times 10^{-3}$  and  $2.7 \times 10^{-3}$  for AS and NS  
330 respectively; Figure 2f). It suggested that AS may have differentially influenced the increase in OD over  
331 time as compared to NS depending on the initial richness level. However, none of the richness levels  
332 responded enough to AS to observe significant differences. Interestingly, the correlation of the  
333 offspring-parent phenotype in AS was significantly higher in level 8 and monocultures than in level 16  
334 (whereas it was not the case in NS; Figure S3), indicating a changing reliability of phenotype  
335 transmission with the change in the initial richness level.

336

### 337 *Artificial selection efficiency within the initial richness levels*

338 Considering the detail of the response of OD through time for each individual or community  
339 within a richness level, we noticed that the variability of the response tended to decrease with the  
340 increase in initial richness (standard deviation of the mean slope in AS and NS together of  $1.0 \times 10^{-2}$  and  
341  $1.6 \times 10^{-3}$  for monocultures and level 16 respectively; Figure S4). It indicated that the changes in OD over  
342 time were more similar between richer communities than between less rich ones or monocultures, where  
343 the responses to evolution were more contrasted. Furthermore, there was a high variability in the  
344 difference in slope between AS and NS within a richness level, especially at low richness levels (i.e. in  
345 monocultures and richness level 2). In monocultures, the two highest differences in slopes between AS  
346 and NS occurred for the two *Arthrobacter* strains ( $2.0 \times 10^{-2}$  and  $1.1 \times 10^{-2}$  for *Arthrobacter* sp. BS2 and  
347 *Arthrobacter* sp. respectively). The two lowest differences between AS and NS occurred for two  
348 *Pseudomonas* strains ( $-2.4 \times 10^{-4}$  and  $8.0 \times 10^{-4}$  for *Pseudomonas* sp. ADPe and *Pseudomonas knackmussii*  
349 DSM 6978 respectively; Figure S4). Thus, certain strains, and maybe genera, seemed to be more  
350 responsive to AS than others.

351

### 352 *Growth dynamics of ancestors and evolved monocultures and communities*

353 Overall, the growth parameters of the ancestors and evolved differed more in communities than  
354 in monocultures (grouping of the ancestors on Figure 3b but not on 3a). However, considering the  
355 difference in growth parameters between ancestors and evolved individual by individual (i.e. looking at  
356 the distance between the ancestor and the corresponding evolved monoculture or community), there was  
357 no difference between monocultures and communities (mean Euclidean distance of  $2.6 \pm 2.1$  and  $2.9 \pm 1.1$   
358 respectively). It highlighted the variability of the response in monocultures in which certain strains  
359 showed strong differences in growth parameters between ancestors and evolved whereas other showed  
360 no changes (Figure S5a and b). All richness levels together, the growth parameters tended to differ more  
361 between ancestors and evolved (Euclidean distance of  $3.0 \pm 1.6$  between ancestor and evolved under AS  
362 and of  $3.3 \pm 1.6$  between ancestor and evolved under NS) than between evolved under AS and evolved

363 under NS ( $1.8 \pm 1.2$ ). Indeed, the growth parameters changed in the same direction between evolved  
364 under AS and evolved under NS. There was an increase in the slope of the exponential growth phase as  
365 compared to the ancestors, which was significant for evolved under AS only (Figure S6a; Table S2),  
366 and a decrease in the time to reach the maximum OD ( $3,263 \text{ min} \pm 926$ ,  $3,404 \text{ min} \pm 986$  and  $4,416$   
367  $\text{min} \pm 534$  for evolved under AS, evolved under NS and ancestors respectively; Figure S6b; Table S2).  
368 The difference in growth parameters between evolved under AS and evolved under NS tended to be  
369 lower in monocultures as compared to communities (Euclidean distance of  $0.98 \pm 0.72$  and  $2.3 \pm 1.1$   
370 respectively), indicating a possible difference in the potential to phenotypic change under AS.

371

### 372 *Metabolism of ancestors and evolved monocultures and communities*

373 The number of metabolized substrates increased with the increase of the initial richness level (it  
374 differed significantly between monocultures and the other richness levels;  $\chi^2=64$ ;  $p_{df=4}=5.0 \times 10^{-13}$ ; Figure  
375 4). It highlighted the existence of substrate use complementarity between the strains of the experiment.  
376 There was neither an effect of the history on the number of metabolized substrates ( $\chi^2=5.7$ ;  $p_{df=2}=0.06$ )  
377 nor an effect of the interaction between the history and the initial community richness ( $\chi^2=13$ ;  
378  $p_{df=8}=0.11$ ). It indicated that metabolic profiles were stable throughout the experimental evolution.

379 The OD reached on the 31 considered substrates was influenced by the initial richness level  
380 ( $\chi^2=43$ ;  $p_{df=4}=1.2 \times 10^{-8}$ ; Table S3) and tended to be lower at lower richness levels (Figure 5a). There was  
381 an effect of the interaction between the initial richness level and the history ( $\chi^2=39$ ;  $p_{df=8}=6.1 \times 10^{-6}$ ; Table  
382 S3). On the one side, the OD of the evolved tended to be higher than this of the ancestors for  
383 monocultures and richness levels 4 and 8. On the other side, the OD of the communities evolved under  
384 AS was lower than this of the communities evolved under NS at level 4 and lower than this of the  
385 ancestors at level 16 (Figure 5b). Thus, there was a trend to a gain or a loss in metabolic capabilities  
386 throughout evolution which depended on the initial richness level. The effect of the initial richness level  
387 on OD depended on the substrate category ( $\chi^2=127$ ;  $p_{df=20}<2.2 \times 10^{-16}$ ; Table S3). Whereas the maximum  
388 OD tended to be achieved at level 4 for the phenolic compounds, the amines, the polymers and the amino  
389 acids, the OD tended to increase with the increase in richness for carbohydrates (maximum OD at level  
390 8) and carboxylic acids (maximum OD at level 16; Figure 5c). It indicated that complementarity between  
391 the different strains occurred for certain substrates only.

392

## 393 **Discussion**

394

395 Our results showed that artificial selection had an effect on the mean productivity of the bacterial  
396 communities and that community richness influenced both the mean productivity and productivity  
397 change over time (Table 2, Figure 2). Contrary to what was expected, there was no effect of the artificial  
398 selection on productivity change over time i.e. no increase in the artificially selected function. Previous  
399 studies showed significant changes over time in the selected function as compared to control treatments

400 (Swenson et al. 2000a; Blouin et al. 2015; Chang et al. 2020). It is quite common however that artificial  
401 selection produces effects on the mean of a function rather than on the slope of function change versus  
402 time (Swenson et al. 2000b; Raynaud et al. 2019; Chang et al. 2020). The difficulty to observe a global  
403 trend in the change in a function under artificial selection is probably due to a lack of heritability,  
404 associated with the absence of stability in community structure (Chang et al. 2020; Jacquiod et al. 2021).  
405 A model developed by Xie et al. (2019) highlighted that the phenotypic variation in a community  
406 function is mainly due to non-heritable determinants, such as variation due to pipetting (when  
407 inoculating for the creation of a new generation) or function measurement noise for example. In  
408 accordance, in our experiment, the mean difference in OD between AS and NS was of 0.11 when  
409 considering the selected parents of the next cycle whereas it dropped to 0.036 when considering the  
410 population mean, revealing an important part of un-transmitted phenotypic variation. The absence of  
411 change in the slope could also be due to natural selection preventing artificial selection to be effective.  
412 Indeed, in artificial selection of communities, natural selection is also at stake within a selection unit, as  
413 observed in the NS treatment. In AS treatment, within-unit natural selection may overwhelm between-  
414 unit artificial selection, making the latter inefficient, as suggested in Wilson and Sober (1989) and Arora  
415 et al. (2020).

416 Species diversity could have multiple effects in artificial selection experiments. In our study,  
417 the initial richness level of the community influenced the selected function (productivity) and other  
418 potentially related ecosystem functions (i.e. growth dynamics, metabolic profile and level of substrate  
419 use, Figures 4 and 5) as often observed in diversity-functioning experiments (Bell et al. 2005; Gravel et  
420 al. 2011; Fetzer et al. 2015). Sequencing data indicated that there was dominance in the communities  
421 from the beginning of the experiment (Figure S7). Indeed, when the initial composition of a community  
422 included both *Escherichia coli* and *Pseudomonas* sp. ADP (ADP3 or ADPe) strains, almost no other  
423 species than these two was detectable. Similar outcomes were observed in previous studies. In Goldford  
424 et al. (2018), despite the various origins of the twelve studied communities and their high initial richness  
425 level (from 110 to 1,290 exact sequence variants (ESV)), all of the communities converged to the same  
426 composition at the family level, i.e. Enterobacteriaceae and Pseudomonadaceae (from 4 to 17 ESV) after  
427 12 serial transfers. This family-level composition was also observed in the study of Scheuerl et al.,  
428 (2020) in all of the 64 studied communities after a five-month experimental evolution.  
429 Enterobacteriaceae and Pseudomonadaceae strains retrieved from the evolved communities in Goldford  
430 et al. (2018) were all able to grow on the metabolic by-products of all other strains of the community,  
431 indicating that cross-feeding was at stake in these communities which may also have occurred in our  
432 experiment. Based on the sequencing data, the *Escherichia-Pseudomonas* co-dominance structure  
433 occurred twice at level 2, three times at level 4, five times at level 8 and six times at level 16 (in both  
434 selection treatments). Thus, the observed positive diversity-functioning relationship could be due to the  
435 increased probability of selecting the cross-feeding community members by increasing the initial  
436 richness level (i.e. a sampling effect of the complementarity effect).

437           The effect of species richness in an artificial selection experiment can also occur through an  
438 interaction with the evolutionary dynamics or with the selection treatments. In our study, the initial  
439 richness level did not significantly influence the effect of the selection treatment (initial richness  
440 level\*selection treatment,  $p_{df=4}=0.059$ ) as the mean productivity was always (and similarly) higher in  
441 AS than in NS whatever the community richness. However, community richness influenced the  
442 evolutionary dynamics (initial richness level\*selection cycle,  $p_{df=4}=7.52 \times 10^{-3}$ , Table 2). The sign of the  
443 effect depended on the initial richness level but also on the considered community within a richness  
444 level; it suggested an influence of community composition on the community evolutionary trajectory.  
445 Thus, as presented in the literature, our results suggest that there is an interplay between community  
446 ecology and community evolution (Johnson and Stinchcombe 2007; O'Brien et al. 2013) and indicate  
447 that the effect of community diversity could change with the timescale at which community function is  
448 considered. Species richness could also affect the way artificial selection influences the evolutionary  
449 dynamics (i.e. the efficiency of artificial selection, identified as the three-way interaction between the  
450 initial richness level, the selection cycle and the selection treatment in Materials and Methods section).  
451 We hypothesized that artificial selection efficiency would increase with the initial richness level through  
452 an increase in the sources of variations (species composition, intra and interspecific interactions...) and  
453 hence an increase in the existing solutions to reach the targeted phenotype. However, there was no  
454 significant difference in the slopes of the OD response versus time between AS and NS depending on  
455 community richness in a linear model (selection cycle\*initial richness level\*selection treatment,  
456  $p_{df=4}=0.842$ , Table 2). Nevertheless, there was still evidence that the initial richness level could influence  
457 artificial selection efficiency as the difference in OD change over time between AS and NS tended to be  
458 non-linearly affected by an increase in community richness (Figure 2f). Moreover, we noticed that the  
459 correlation between parent and offspring OD depended on the initial richness level and that it also  
460 responded idiosyncratically to an increase in richness (Figure S3). Previous modelling approaches  
461 highlighted that in artificial selection of communities, a fine balance between variation and heritability  
462 must be achieved (Penn 2003). Based on our results, we suggest that the search for this equilibrium  
463 could occur through the modulation of community diversity. But, in addition to the initial species  
464 richness, divergence between replicates within a richness level has to be considered to understand the  
465 effect of the initial diversity on the efficiency of artificial selection.

466           Increasing the initial richness level decreased the between-community variation within a  
467 richness level. This especially came with the design of our experiment but could also occur when  
468 working on natural communities. In our study, we built the different communities from an initial pool  
469 of 18 strains. As a consequence, whereas none of the communities of level 2 included strains in common,  
470 seven strains were found in the six communities of level 16 (and at least one *Escherichia* and  
471 *Pseudomonas* strain as discussed above; Table S4). It is well-known that community composition has  
472 an effect on community functioning as, for a given richness level, a panel of community phenotypes can  
473 be observed depending on community composition (Bell et al. 2005; Fetzer et al. 2015). Between-

474 community differences in composition could also be potential levers for artificial selection. In a recent  
475 study, Sánchez et al. (2021) proposed that an efficient directed evolution of microbial community would  
476 occur through a good exploration of the “ecological structure-function landscape”. In order to explore  
477 more solutions to reach the targeted community phenotype (the “function” component of the landscape),  
478 multiple communities varying for their composition (the “structure” component of the landscape) have  
479 to be considered. In this idea, the first step of a directed evolution experiment would be to create a library  
480 of communities varying for their composition (Sánchez et al. 2021). In the light of our results, we suggest  
481 that the differences in community composition in the initial pool of selection units must be sharp enough  
482 (e.g. family-level differences) to avoid resemblance in community dynamics that would reduce the  
483 exploration of multiple evolutionary trajectories. A first solution could be to start from an initial pool of  
484 species several times higher than the number of species in the highest richness level (e.g. 64 instead of  
485 18 species to build six replicates of the 16-species level that deeply differ in their composition). Another  
486 way to ensure sufficient compositional variability is the maintenance of multiple lineages over the  
487 experiment (Blouin et al. 2015; Jacquiod et al. 2021). In a recent study, (Chang et al. 2020) started from  
488 a pool of 12 communities which were replicated seven or eight times each for a total of 92 communities.  
489 A selection cycle occurred through the selection of the 23 best performing communities among the 92  
490 and, after six selection cycles, all of the communities stemmed from an unique parental community  
491 (Chang et al. 2020). The single lineage increased the probability that the gain in the targeted function  
492 under AS was due to the elimination of the less performing communities but not to an increase in the  
493 function itself. Applying artificial selection within several independent lineages would prevent the  
494 results to be due to ecological sorting (i.e. a simple identification of the best performing communities in  
495 an initial pool) and enhance the probability of finding communities that are responsive to the selection.

496 In the present study, we showed that the diversity of the communities could play a role in the  
497 artificial selection procedures. Community richness had an effect on the selected property and influenced  
498 the community evolutionary dynamics. Also, we found evidence that it could impact the efficiency of  
499 artificial selection, but the trade-off between increasing richness and maintaining variability in  
500 composition makes the effect of the initial richness non-linear. Indeed, one of the limitations that can  
501 occur when increasing initial community richness from a limited pool of species is the convergence in  
502 community composition that may reduce between-community variations for artificial selection to act  
503 upon. Once this limitation is avoided, we suggest that applying artificial selection on community varying  
504 for their diversity could allow to explore multiple variability/heritability. Protocol optimization is still  
505 needed for artificial selection of microbial communities to be efficient and, multiple lines of  
506 improvement have already been highlighted by recent modelling approaches and experimental studies.  
507 Further studies will be needed to disentangle the links between community ecological dynamics and  
508 community evolutionary trajectory, which will open the way for effective microbial community and  
509 microbiome engineering.

510

511 **Acknowledgments**

512 We thank David Bru and Jérémie Béguet from the EMFEED team, INRAE Dijon, for their advice on  
513 molecular biology analyses. This work was supported by grants from the INRAE, AGROECOSYS-  
514 TEM department, “Pari scientifique” program, ref 6503.

515

516 **Author contributions**

517 A.S., M.B. and T.R. designed the study. M.D. and T.R performed the experiments. A.S. and T.R.  
518 analyzed the data. T.R. wrote the paper with substantial contributions of A.S. and M.B.

519

520 **Data sharing plans**

521 All the data and codes used during the study will be available from the corresponding author on  
522 reasonable request.

523

524 **Conflict of interest**

525 The authors have no conflict of interest to declare.



526 **References**

527

528 Altschul SF, Gish W, Miller W, et al (1990) Basic local alignment search tool. *J Mol Biol* 215:403–410.

529 [https://doi.org/10.1016/S0022-2836\(05\)80360-2](https://doi.org/10.1016/S0022-2836(05)80360-2)

530 Arora J, Mars Brisbin MA, Mikheyev AS (2020) Effects of microbial evolution dominate those of  
531 experimental host-mediated indirect selection. *PeerJ* 8:e9350.

532 <https://doi.org/10.7717/peerj.9350>

533 Barraclough TG (2015) How Do Species Interactions Affect Evolutionary Dynamics Across Whole  
534 Communities? *Annu Rev Ecol Evol Syst* 46:25–48. [https://doi.org/10.1146/annurev-ecolsys-](https://doi.org/10.1146/annurev-ecolsys-112414-054030)

535 [112414-054030](https://doi.org/10.1146/annurev-ecolsys-112414-054030)

536 Bell T, Newman JA, Silverman BW, et al (2005) The contribution of species richness and composition  
537 to bacterial services. *Nature* 436:1157–1160. <https://doi.org/10.1038/nature03891>

538 Blouin M, Karimi B, Mathieu J, Lerch TZ (2015) Levels and limits in artificial selection of communities.

539 *Ecol Lett* 18:1040–1048. <https://doi.org/10.1111/ele.12486>

540 Chang C, Osborne ML, Bajic D, Sanchez A (2020) Artificially selecting bacterial communities using  
541 propagule strategies. *Evolution* 74:2392–2403. <https://doi.org/10.1111/evo.14092>

542 Conner JK (2003) Artificial selection: a powerful tool for ecologists. *Ecology* 84:1650–1660

543 Edgar RC (2018) UNCROSS2: identification of cross-talk in 16S rRNA OTU tables.

544 <https://doi.org/10.1101/400762>

545 Esling P, Lejzerowicz F, Pawlowski J (2015) Accurate multiplexing and filtering for high-throughput  
546 amplicon-sequencing. *Nucleic Acids Res* 43:2513–2524. <https://doi.org/10.1093/nar/gkv107>

547 Fetzer I, Johst K, Schäwe R, et al (2015) The extent of functional redundancy changes as species' roles  
548 shift in different environments. *Proc Natl Acad Sci* 112:14888–14893.

549 <https://doi.org/10.1073/pnas.1505587112>

550 Fox J, Weisberg S (2019) An {R} Companion to Applied Regression, Third Edition. Thousand Oaks  
551 CA: Sage. <https://socialsciences.mcmaster.ca/jfox/Books/Companion/>

552 Goldford JE, Lu N, Bajić D, et al (2018) Emergent simplicity in microbial community assembly. *Science*  
553 361:469–474. <https://doi.org/10.1126/science.aat1168>

554 Goodnight CJ (2000) Heritability at the ecosystem level. *Proc Natl Acad Sci* 97:9365–9366.  
555 <https://doi.org/10.1073/pnas.97.17.9365>

556 Gravel D, Bell T, Barbera C, et al (2011) Experimental niche evolution alters the strength of the  
557 diversity–productivity relationship. *Nature* 469:89–92. <https://doi.org/10.1038/nature09592>

558 Hooper DU, Chapin FS, Ewel JJ, et al (2005) Effects of Biodiversity on Ecosystem Functioning: A  
559 Consensus of Current Knowledge. *Ecol Monogr* 75:3–35. <https://doi.org/10.1890/04-0922>

560 Jacquiod S, Spor A, Wei S, et al (2021) Artificial selection of stable rhizosphere microbiota leads to  
561 heritable plant phenotype changes. <https://doi.org/10.1101/2021.04.13.439601>

- 562 Johnson MTJ, Stinchcombe JR (2007) An emerging synthesis between community ecology and  
563 evolutionary biology. *Trends Ecol Evol* 22:250–257. <https://doi.org/10.1016/j.tree.2007.01.014>
- 564 Kuznetsova A, Brockhoff PB, Christensen RHB (2017) lmerTest Package: Tests in Linear Mixed  
565 Effects Models. *J Stat Softw* 82. <https://doi.org/10.18637/jss.v082.i13>
- 566 Lê S, Josse J, Husson F (2008) FactoMineR: An R Package for Multivariate Analysis. *J Stat Softw* 25.  
567 <https://doi.org/10.18637/jss.v025.i01>
- 568 Lenth RV (2021) emmeans: Estimated Marginal Means, aka Least-Squares Means. R package version  
569 1.5.5-1. <https://CRAN.R-project.org/>
- 570 Loreau M, Hector A (2001) Partitioning selection and complementarity in biodiversity experiments.  
571 *Nature* 412:72–76. <https://doi.org/10.1038/35083573>
- 572 Loreau M, Naeem S, Inchausti P, et al (2001) Biodiversity and ecosystem functioning: current  
573 knowledge and future challenges. *Science* 294:804–808.  
574 <https://doi.org/10.1126/science.1064088>
- 575 Lush JL (1937) *Animal breeding plans*. Iowa State Press, Ames, Iowa
- 576 Montserrat Sala M, Arrieta J, Boras J, et al (2010) The impact of ice melting on bacterioplankton in the  
577 Arctic Ocean. *Polar Biol* 33:1683–1694. <https://doi.org/10.1007/s00300-010-0808-x>
- 578 Muggeo VMR (2008) segmented: an R Package to Fit Regression Models with Broken-Line  
579 Relationships. *R News* 20–25
- 580 O’Brien S, Hodgson DJ, Buckling A (2013) The interplay between microevolution and community  
581 structure in microbial populations. *Curr Opin Biotechnol* 24:821–825.  
582 <https://doi.org/10.1016/j.copbio.2013.02.022>
- 583 Penn A (2003) Modelling artificial ecosystem selection: A preliminary investigation. In: *European*  
584 *Conference on Artificial Life*. Springer, pp 659–666
- 585 Pinheiro J, Bates D, DebRoy S, et al (2021) nlme: Linear and Nonlinear Mixed Effects Models R  
586 package version 3.1-1. <https://CRAN.R-project.org/package=nlme>
- 587 Raynaud T, Devers M, Spor A, Blouin M (2019) Effect of the Reproduction Method in an Artificial  
588 Selection Experiment at the Community Level. *Front Ecol Evol* 7:416.  
589 <https://doi.org/10.3389/fevo.2019.00416>
- 590 Rognes T, Flouri T, Nichols B, et al (2016) VSEARCH: a versatile open source tool for metagenomics.  
591 *PeerJ* 4:e2584. <https://doi.org/10.7717/peerj.2584>
- 592 Sánchez Á, Vila JCC, Chang C-Y, et al (2021) Directed Evolution of Microbial Communities. *Annu*  
593 *Rev Biophys* 50:323–341. <https://doi.org/10.1146/annurev-biophys-101220-072829>
- 594 Scheuerl T, Hopkins M, Nowell RW, et al (2020) Bacterial adaptation is constrained in complex  
595 communities. *Nat Commun* 11:754. <https://doi.org/10.1038/s41467-020-14570-z>
- 596 Scrucca L, Fop M, Murphy T Brendan, Raftery A E (2016) mclust 5: Clustering, Classification and  
597 Density Estimation Using Gaussian Finite Mixture Models. *R J* 8:289.  
598 <https://doi.org/10.32614/RJ-2016-021>

- 599 Swenson W, Arendt J, Wilson DS (2000a) Artificial selection of microbial ecosystems for 3-  
600 chloroaniline biodegradation. *Environ Microbiol* 2:564–571. [https://doi.org/10.1046/j.1462-](https://doi.org/10.1046/j.1462-2920.2000.00140.x)  
601 2920.2000.00140.x
- 602 Swenson W, Wilson DS, Elias R (2000b) Artificial ecosystem selection. *Proc Natl Acad Sci* 97:9110–  
603 9114. <https://doi.org/10.1073/pnas.150237597>
- 604 Van den Bergh B, Swings T, Fauvart M, Michiels J (2018) Experimental Design, Population Dynamics,  
605 and Diversity in Microbial Experimental Evolution. *Microbiol Mol Biol Rev* 82:e00008-18,  
606 /mmlbr/82/3/e00008-18.atom. <https://doi.org/10.1128/MMBR.00008-18>
- 607 Williams HTP, Lenton TM (2007) Artificial selection of simulated microbial ecosystems. *Proc Natl*  
608 *Acad Sci* 104:8918–8923. <https://doi.org/10.1073/pnas.0610038104>
- 609 Wilson DS, Sober E (1989) Reviving the superorganism. *J Theor Biol* 136:337–356.  
610 [https://doi.org/10.1016/S0022-5193\(89\)80169-9](https://doi.org/10.1016/S0022-5193(89)80169-9)
- 611 Wright RJ, Gibson MI, Christie-Oleza JA (2019) Understanding microbial community dynamics to  
612 improve optimal microbiome selection. *Microbiome* 7:1-14. [https://doi.org/10.1186/s40168-](https://doi.org/10.1186/s40168-019-0702-x)  
613 019-0702-x
- 614 Xie L, Yuan AE, Shou W (2019) Simulations reveal challenges to artificial community selection and  
615 possible strategies for success. *PLOS Biol* 17:e3000295.  
616 <https://doi.org/10.1371/journal.pbio.3000295>
- 617 Zhang J, Kobert K, Flouri T, Stamatakis A (2014) PEAR: a fast and accurate Illumina Paired-End reAd  
618 mergeR. *Bioinformatics* 30:614–620. <https://doi.org/10.1093/bioinformatics/btt593>
- 619

620 **Table 1: Bacterial strains used in the experiment.** Note that *Aminobacter aminovorans* was  
621 previously known as *Chelatobacter heintzii*.  
622

| Strain                                    | Phylum         | Class                    |
|-------------------------------------------|----------------|--------------------------|
| <i>Alcaligenes eutrophus</i> JMP131       | Proteobacteria | $\beta$ -proteobacteria  |
| <i>Agrobacterium</i> sp. 9023             | Proteobacteria | $\alpha$ -proteobacteria |
| <i>Aminobacter aminovorans</i> SR38       | Proteobacteria | $\alpha$ -proteobacteria |
| <i>Arthrobacter</i> sp.                   | Actinobacteria | Actinobacteria           |
| <i>Arthrobacter</i> sp. BS2               | Actinobacteria | Actinobacteria           |
| <i>Cupriavidus necator</i> JMP134         | Proteobacteria | $\beta$ -proteobacteria  |
| <i>Dyadobacter fermentans</i> DSM 18053   | Bacteroidetes  | Flavobacteria            |
| <i>Escherichia coli</i> K12               | Proteobacteria | $\gamma$ -proteobacteria |
| <i>Escherichia coli</i> WA803             | Proteobacteria | $\gamma$ -proteobacteria |
| <i>Microbacterium</i> sp. C448            | Actinobacteria | Actinobacteria           |
| <i>Pseudomonas azelaica</i>               | Proteobacteria | $\gamma$ -proteobacteria |
| <i>Pseudomonas knackmussii</i> DSM 6978   | Proteobacteria | $\gamma$ -proteobacteria |
| <i>Pseudomonas</i> sp. ADP3               | Proteobacteria | $\gamma$ -proteobacteria |
| <i>Pseudomonas</i> sp. ADPe               | Proteobacteria | $\gamma$ -proteobacteria |
| <i>Pseudopedobacter saltans</i> DSM 12145 | Bacteroidetes  | Sphingobacteria          |
| <i>Ralstonia</i> sp.                      | Proteobacteria | $\beta$ -proteobacteria  |
| <i>Sphingomonas wittichii</i> RW1         | Proteobacteria | $\alpha$ -proteobacteria |
| <i>Variovorax</i> sp. 38R                 | Proteobacteria | $\beta$ -proteobacteria  |

623

624 **Table 2 Deviance table of the covariance analysis (ANCOVA) of the optical density (OD) through**  
625 **experimental evolution.** The effect of the selection cycle (from 1 to 40), the initial richness level (1, 2,  
626 4, 8, 16), the selection treatment (artificial selection, no artificial selection) and their interactions on OD  
627 were estimated with a linear mixed model including the identity of the selection unit as a random effect  
628 factor and an autoregression structure. The conditional  $R^2$  is presented (i.e. variance explained by both  
629 fixed and random effect factors; the marginal  $R^2$  – fixed effect factors only – was 0.33).  
630

|                                                                | Df | Chi squared | p                                            |
|----------------------------------------------------------------|----|-------------|----------------------------------------------|
| Selection cycle                                                | 1  | 10.4        | <b><math>1.24 \times 10^{-3}</math></b>      |
| Initial richness level                                         | 4  | 22.6        | <b><math>1.53 \times 10^{-4}</math></b>      |
| Selection treatment                                            | 1  | 89.0        | <b><math>&lt; 2.2 \times 10^{-16}</math></b> |
| Selection cycle * Initial richness level                       | 4  | 13.9        | <b><math>7.52 \times 10^{-3}</math></b>      |
| Selection cycle * Selection treatment                          | 1  | 0.734       | 0.391                                        |
| Initial richness level * Selection treatment                   | 4  | 9.09        | 0.059                                        |
| Selection cycle * Initial richness level * Selection treatment | 4  | 1.41        | 0.842                                        |
|                                                                |    | $R^2=0.80$  |                                              |

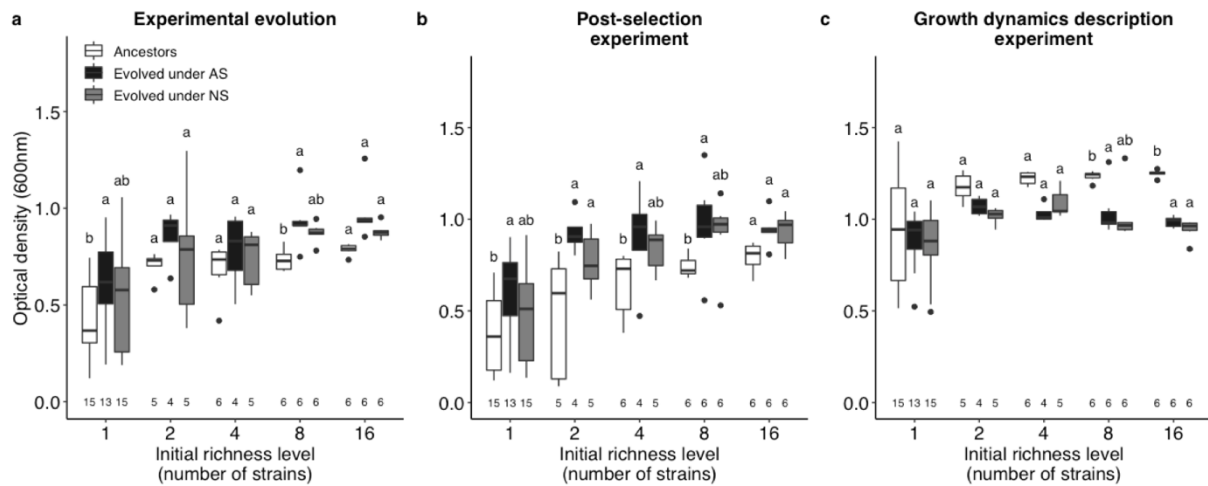

631

632

633 **Figure 1 Optical density (OD) after 3.5 days of growth of ancestors and evolved monocultures and**

634 **communities under artificial selection (AS) and no artificial selection (NS) depending on the initial**

635 **richness level.** a: OD measured during the experimental evolution experiment. The values of the

636 ancestor corresponded to the values measured at cycle 1 (mean of AS and NS). The values of the evolved

637 under AS and NS corresponded to the values measured at cycle 40. b: OD measured in the post-selection

638 experiment (i.e. in the same experimental conditions). c: OD measured in the growth dynamics

639 description experiment (i.e. in different experimental conditions). Each box represent the first quartile,

640 the median and the third quartile for a given treatment, the end of the bars shows the minimal and

641 maximal values within 1.5 times the interquartile range. The points outside of the boxes represent

642 outliers. Sample sizes are given on the bottom of the graphs. Different letters represent significant

643 differences between the histories within a richness level. White: ancestors; black: evolved under

644 artificial selection; grey: evolved under no artificial selection.

645

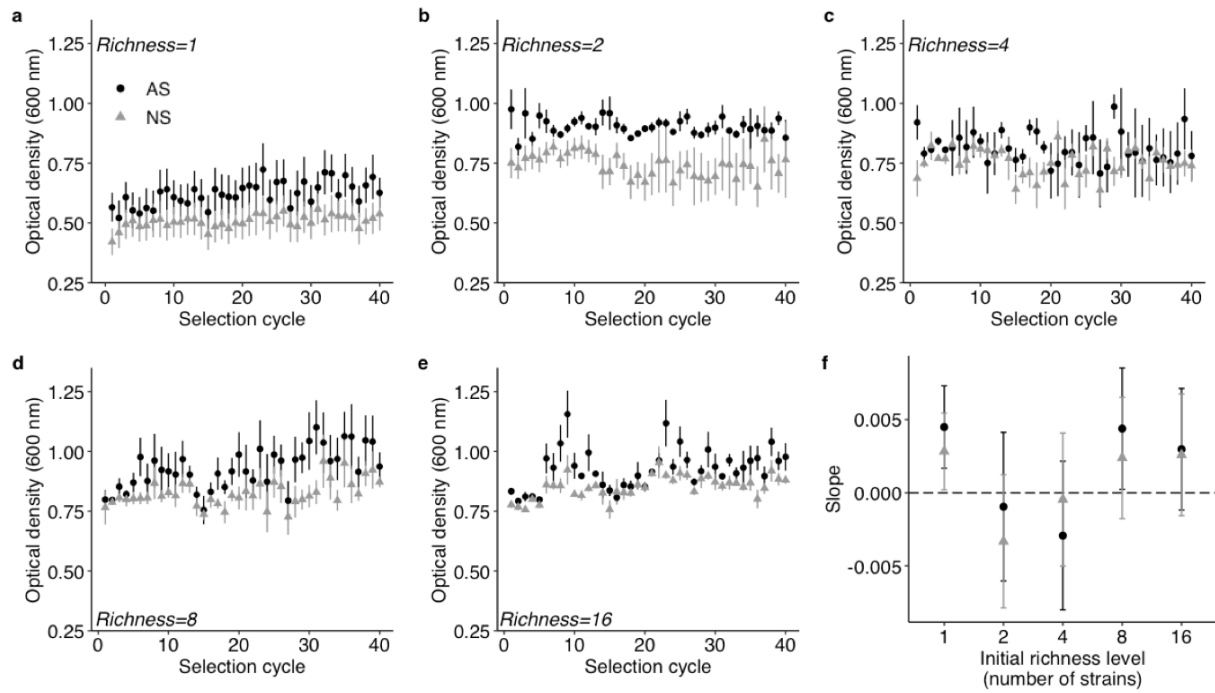

646

647

648 **Figure 2 Changes in optical density (OD) over experimental evolution under artificial selection**

649 **(AS) and no artificial selection (NS) depending on the initial richness level. a to e: The mean OD of**

650 **the parents of the next population of selection units is represented by black circles for AS and grey**

651 **triangles for NS for each initial richness level. Bars represent SE. Richness 1: n=13 in AS and 15 in NS**

652 **(n=14 at cycle 33). Richness 2 and 4: n=4 in AS and 5 in NS. Richness 8 and 16: n=6 in AS and NS.**

653 **The OD at cycle 0 was equal to 0.002 for all the treatments. f: The mean slopes of the regression lines**

654 **predicted by a linear mixed model are presented in black circles for AS and grey triangles for NS for**

655 **each initial richness level. Bars represent 95% CI.**

656

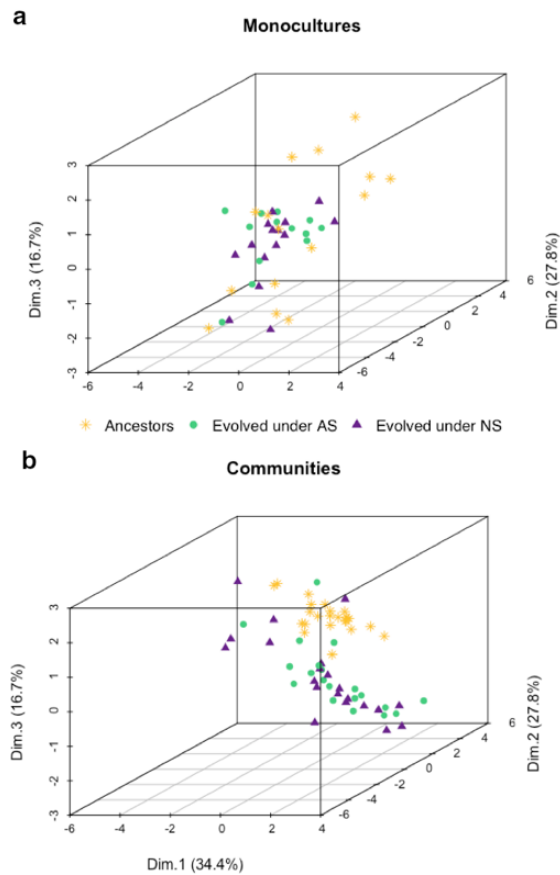

657

658

659 **Figure 3 Principal component analysis of the growth parameters of ancestors and evolved**  
660 **monocultures (a) and communities (b).** The ten growth parameters included in the analysis were  
661 retrieved from the description of growth curves obtained by repeated optical density (OD) measurements  
662 over 3.5 days. Those parameters were: the four slopes of the different growth phases, the three times  
663 associated to the transition from one phase to the other, the OD at 3.5 days, the maximum OD and the  
664 time to reach the maximum OD. The results obtained for monocultures and communities are presented  
665 separately for readability but were obtained from a unique analysis. Star: ancestors; circle: evolved under  
666 artificial selection; triangle: evolved under no artificial selection.



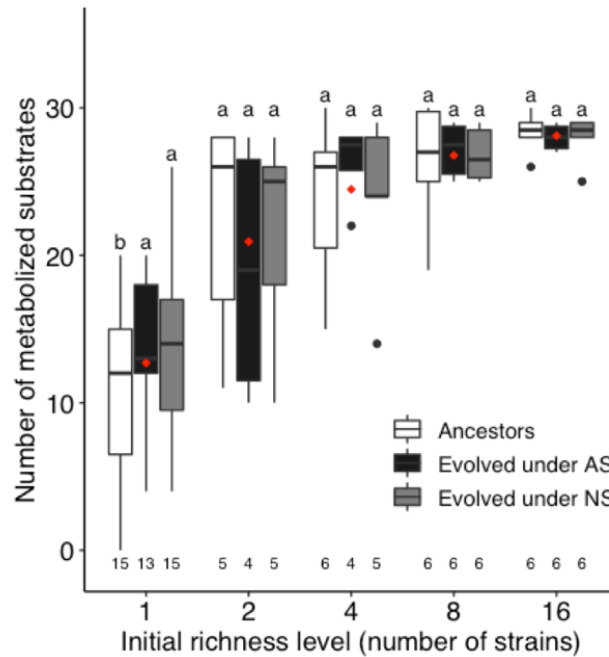

667

668

669 **Figure 4 Number of metabolized substrates by ancestors and evolved monocultures and**  
670 **communities depending on the initial richness level.** 31 substrates were tested in total. White:  
671 ancestors; black: evolved under artificial selection; grey: evolved under no artificial selection. Red  
672 diamonds represent the mean value for a given initial richness level. Each box represent the first quartile,  
673 the median and the third quartile for a given treatment, the end of the bars shows the minimal and  
674 maximal values within 1.5 times the interquartile range. The points outside of the boxes represent  
675 outliers. Sample sizes are given on the bottom of the graphs. Different letters represent significant  
676 differences between the histories within a richness level.

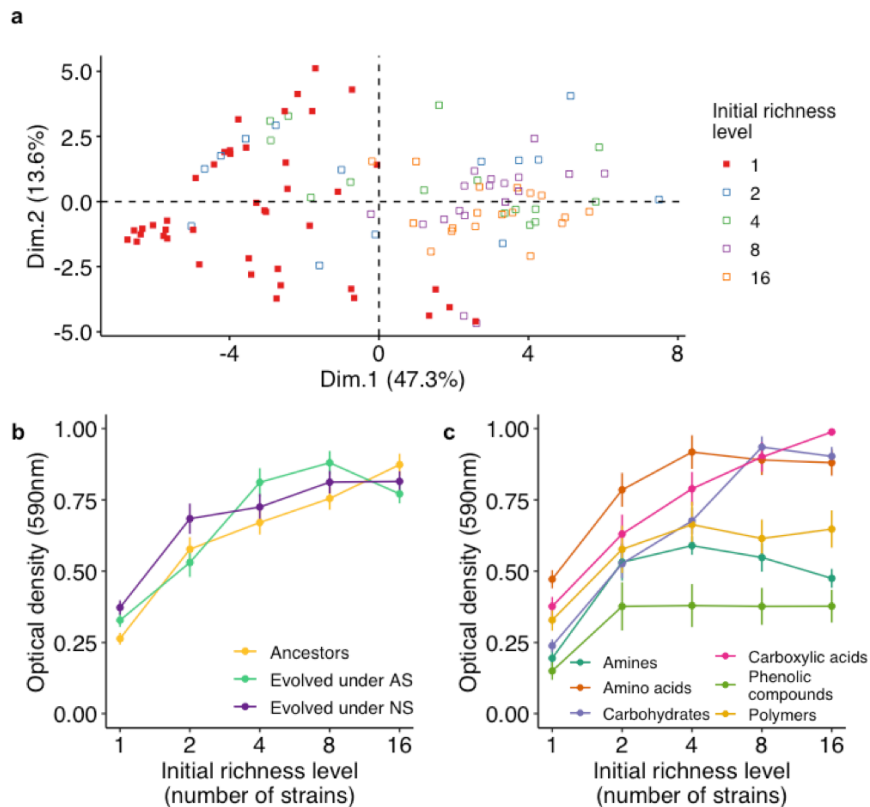

677

678

679 **Figure 5 Substrate use depending on the initial richness level.** a: Principal component analysis of the  
680 optical density measured on 31 carbon substrates for monocultures and communities. Ancestors,  
681 evolved under artificial selection and evolved under no artificial selection are all represented on the  
682 graph without distinction. The more a point is on the right of the graph, the more the corresponding  
683 strain or community reached a high OD on the tested substrates. b: Mean OD reached on the 31 tested  
684 substrates depending on the initial richness level and the history. Yellow: ancestors; green: evolved  
685 under artificial selection; violet: evolved under no artificial selection. c: Mean OD reached on each  
686 substrate category depending on the initial richness level. Bars represent SE. From lowest to highest  
687 value at level 1: phenolic compounds, amines, carbohydrates, polymers, carboxylic acids, amino acids.
